# Supplementary material
Source: publisher site journal article supplement (https://www.dovepress.com/article/501341)
Supplement: Supplementary file 1 [file get_supplementary_file.php]

**Supplementary Material for**

**Management of CPAP follow-up by telemonitoring in obstructive sleep apnea: the PROTEUS project**

**Table S1 – Comparison between males and females**

|  | **Females** | **Males** |  |
| --- | --- | --- | --- |
|  | **N=146** | **N=340** | ***p*** |
| **Demographics** | | | |
| Age (years) | 70,02±11,34 | 67,89±12,31 | 0,075 |
| Age >65 yr (%) | 71% | 64% | 0,147 |
| **CPAP data** | | | |
| rAHI (events·h-1) | 3,99±5,65 | 3,93±5,07 | 0,898 |
| rAHI >10 events·h-1 (%) | 9% | 9% | 0,87 |
| Usage hours (h) | 6,24±1,67 | 6,40±1,74 | 0,331 |
| Adherence (%) | 87,31±16,26 | 88,8±18,32 | 0,396 |
| High leakage (%) | 19% | 27% | 0,082 |

**Table S2 – Comparison between patients with CPAP usage threshold of 4 h·night-1**

|  | **<4h·night-1** | **≥4h·night-1** |  |
| --- | --- | --- | --- |
|  | **N=22** | **N=464** | ***p*** |
| **Demographics** |  |  |  |
| Sex (male) | 65% | 70% | 0,596 |
| Age (years) | 67,65±14,51 | 68,57±11,94 | 0,721 |
| Age >65 yr (%) | 57% | 67% | 0,313 |
| **CPAP data** |  |  |  |
| rAHI (events·h-1) | 6,03±6,06 | 3,84±5,19 | 0,051 |
| rAHI >10 events·h-1 (%) | 13% | 9% | 0,527 |
| High leakage (%) | 20% | 25% | 0,674 |

**Table S3 – Comparison between different thresholds of CPAP usage**

|  | **Group 1 (4-6h)** | **Group 2 (6-8h)** | **Group 3 (>8h)** | |
| --- | --- | --- | --- | --- |
|  | **N=109** | **N=241** | **N=114** | **p** |
| **Demographics** | |  |  |  |
| Sex (male) | 65% | 71% | 74% | 0,459 |
| Age (years) | 68,64±11,23 | 67,88±11,32 | 69,71±13,96 | 0,613 |
| Age >65 yr (%) | 64% | 66% | 70% | 0,684 |
| **CPAP data** | |  |  |  |
| rAHI (events·h-1) | 4,55±6,02 | 3,75±4,82 | 3,38±5,03 | 0,078 |
| rAHI >10 events·h-1 (%) | 11% | 9% | 8% | 0,756 |
| High leakage (%) | 21%* | 21%* | 35%* | **0,043** |

* Bonferroni post-hoc: Group 3 > Group 2 = Group 1

A p-value less than 0.05 was marked in bold

**Table S4 – Comparison between population with residual AHI thresholds of 10 events·h-1**

|  | **AHI <10** | **AHI ≥10** |  |
| --- | --- | --- | --- |
|  | **N=441** | **N=45** | **p** |
| **Demographics** |  |  |  |
| Sex (male) | 70% | 71% | 0,737 |
| Age (years) | 67,87±11,97 | 74,36±11,33 | 0,301 |
| Age >65 yr (%) | 64% | 87% | **<0,0001** |
| **CPAP data** | | | |
| Usage hours (h) | 6,38±1,69 | 6,03±1,97 | 0,445 |
| Adherence (%) | 88,91±16,77 | 82,56±24,95 | **<0,0001** |
| High leakage (%) | 23% | 38% | **0,003** |

A p-value less than 0.05 was marked in bold

**Table S5 – Comparison of patients with different age**

|  | **Group A**  **(<50 yr)** | **Group B**  **(50-70 yr)** | **Group C**  **(>70 yr)** |  |
| --- | --- | --- | --- | --- |
|  | **N=33** | **N=205** | **N=248** | ***p*** |
| **Demographics** | | | | |
| Sex (male) | 79% | 71% | 68% | 0,415 |
| **CPAP data** | |  |  |  |
| rAHI (events·h-1) | 2,72±2,88* | 3,35±4,10* | 4,61±6,18* | **0,014** |
| rAHI >10 events·h-1 (%) | 6%* | 6%* | 13%* | **0,039** |
| Usage hours (h) | 6,33±1,81 | 6,3±1,54 | 6,40±1,85 | 0,795 |
| Adherence (%) | 85,91±19,58 | 89,74±15,68 | 87,54±19,00 | 0,303 |
| High leakage (%) | 20% | 20% | 29% | 0,176 |

* Bonferroni post-hoc: Group C > Group B = Group A

A p-value less than 0.05 was marked in bold

**Table S6 - Comparison studies analyzed**

Studies were included in the analysis that compared the standard of care, included more than 100 patients, conducted retrospectively in real-life settings, studies with patients treated with CPAP for at least 1 year, as well as those that accepted treatment after CPAP titration, regardless of OSA severity.

| **Study** | **Country** | **N°patients** | **Year follow-up** | | | | | **Definition of “non CPAP-adherence”** |
| --- | --- | --- | --- | --- | --- | --- | --- | --- |
| **1** | **2** | **3** | **4** | **5** |
| Morrone et al. [1] | Italy | 1,339 | 78% | — | — | — | — | < 4 h·night-1 |
| Tan et al. [2] | Singapore | 381 | 78% | — | — | — | — | < 4 h·night-1, 70% of nights |
| Jacobsen et al.[3] | Denmark | 666 | 79% | — | — | — | — | CPAP discontinuation for several causes |
| ALASKA[4] | France | 480,000 | 77% | 43% | 52% | — | — | Discontinuation of CPAP reimbursement for several causes |
| McArdle et al.[5] | UK | 1,211 | 84% | 79% | 74% | 69% | 68% | CPAP discontinuation for several causes |
| Woehrle et al.[6] | Germany | 98,329 | 88% | — | — | — | — | CPAP discontinuation for several causes |
| Zampogna et al.[7] | Italy | 147 | 93% | 93% | 83% | 81% | 76% | CPAP discontinuation for several causes |
| Schoch et al.[8] | Switzerland | 1,756 | 74% | 66% | 60% | 57% | 55% | < 1 h·night-1 |
| Drager et al.[9] | Brazil;  Mexico;  USA | 4,181,490 | 83% | — | — | — | — | CPAP non-use for 30 consecutive days |
| **PROTEUS** | **Italy** | **623** | **91.4%** | **89%** | **87.6%** | **87.3%** | **87%** | **< 4 h·night-1 and 70% of nights** |

**References**

[1] Morrone E, Giordano A, Carli S, Visca D, Rossato F, Godio M, et al. Something is changing in adherence to CPAP therapy: real world data after 1 year of treatment in patients with obstructive sleep apnoea. European Respiratory Journal 2020;55. https://doi.org/10.1183/13993003.01419-2019.

[2] Tan B, Tan A, Chan YH, Mok Y, Wong HS, Hsu PP. Adherence to Continuous Positive Airway Pressure therapy in Singaporean patients with Obstructive Sleep Apnea. Am J Otolaryngol 2018;39:501–6. https://doi.org/10.1016/j.amjoto.2018.05.012.

[3] Jacobsen AR, Eriksen F, Hansen RW, Erlandsen M, Thorup L, Damgård MB, et al. Determinants for adherence to continuous positive airway pressure therapy in obstructive sleep apnea. PLoS One 2017;12:e0189614. https://doi.org/10.1371/journal.pone.0189614.

[4] Pépin J-L, Bailly S, Rinder P, Adler D, Szeftel D, Malhotra A, et al. CPAP Therapy Termination Rates by OSA Phenotype: A French Nationwide Database Analysis. J Clin Med 2021;10:936. https://doi.org/10.3390/jcm10050936.

[5] McArdle N, Devereux G, Heidarnejad H, Engleman HM, Mackay TW, Douglas NJ. Long-term use of CPAP therapy for sleep apnea/hypopnea syndrome. Am J Respir Crit Care Med 1999;159:1108–14. https://doi.org/10.1164/ajrccm.159.4.9807111.

[6] Woehrle H, Arzt M, Graml A, Fietze I, Young P, Teschler H, et al. Predictors of positive airway pressure therapy termination in the first year: analysis of big data from a German homecare provider. BMC Pulm Med 2018;18:186. https://doi.org/10.1186/s12890-018-0748-8.

[7] Zampogna E, Spanevello A, Lucioni AM, Facchetti C, Sotgiu G, Saderi L, et al. Adherence to Continuous Positive Airway Pressure in patients with Obstructive Sleep Apnoea. A ten year real life study. Respir Med 2019;150:95–100. https://doi.org/10.1016/j.rmed.2019.02.017.

[8] Schoch OD, Baty F, Niedermann J, Rüdiger JJ, Brutsche MH. Baseline predictors of adherence to positive airway pressure therapy for sleep apnea: a 10-year single-center observational cohort study. Respiration 2014;87:121–8. https://doi.org/10.1159/000354186.

[9] Drager LF, Malhotra A, Yan Y, Pépin J-L, Armitstead JP, Woehrle H, et al. Adherence with positive airway pressure therapy for obstructive sleep apnea in developing vs. developed countries: a big data study. J Clin Sleep Med 2021;17:703–9. https://doi.org/10.5664/jcsm.9008.
